# Supplementary material for: Mouse model phenotypes provide information about human drug targets
Source: PubMed Central journal article supplement (PMC3933875; doi:10.1093/bioinformatics/btt613), 2013-10-24
Supplement: supp_btt613_drugtargets-supplement.pdf [file supp_btt613_drugtargets-supplement.pdf]

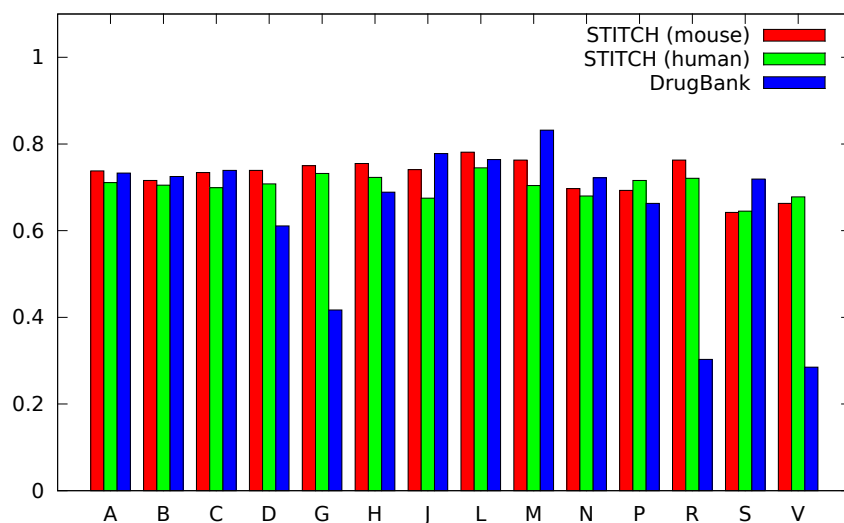

Figure 1: A graphical representation of the ROCAUC values for different drug classes in each of our evaluation datasets. A standards for the ATC class *ALIMENTARY TRACT AND METABOLISM*, B for *BLOOD AND BLOOD FORMING ORGANS*, C for *CARDIOVASCULAR SYSTEM*, D for *DERMATOLOGICALS*, G for *GENITO URINARY SYSTEM AND SEX HORMONES*, H for *SYSTEMIC HORMONAL PREPARATIONS, EXCL. SEX HORMONES AND INSULINS*, J for *ANTIINFECTIVES FOR SYSTEMIC USE*, L for *ANTINEOPLASTIC AND IMMUNOMODULATING AGENTS*, M for *MUSCULO-SKELETAL SYSTEM*, N for *NERVOUS SYSTEM*, P for *ANTIPARASITIC PRODUCTS, INSECTICIDES AND REPELLENTS*, R for *RESPIRATORY SYSTEM*, S for *SENSORY ORGANS*, and V for *VARIOUS*.

| ATC category                                                        | ROCAUC (STITCH mouse) | ROCAUC (STITCH human) | ROCAUC (Drug-Bank) |
|---------------------------------------------------------------------|-----------------------|-----------------------|--------------------|
| ALIMENTARY TRACT AND METABOLISM (A)                                 | 0.738 (1255)          | 0.711 (1729)          | 0.733 (62)         |
| BLOOD AND BLOOD FORMING ORGANS (B)                                  | 0.716 (200)           | 0.705 (286)           | 0.725 (8)          |
| CARDIOVASCULAR SYSTEM (C)                                           | 0.734 (1501)          | 0.699 (2312)          | 0.739 (144)        |
| DERMATOLOGICALS (D)                                                 | 0.739 (518)           | 0.708 (717)           | 0.611 (12)         |
| GENITO URINARY SYSTEM AND SEX HORMONES (G)                          | 0.75 (339)            | 0.732 (488)           | 0.417 (7)          |
| SYSTEMIC HORMONAL PREPARATIONS, EXCL. SEX HORMONES AND INSULINS (H) | 0.755 (51)            | 0.723 (72)            | 0.689 (4)          |
| ANTIINFECTIVES FOR SYSTEMIC USE (J)                                 | 0.741 (107)           | 0.675 (217)           | 0.778 (8)          |
| ANTINEOPLASTIC AND IMMUNOMODULATING AGENTS (L)                      | 0.781 (796)           | 0.745 (1158)          | 0.764 (32)         |
| MUSCULO-SKELETAL SYSTEM (M)                                         | 0.763 (230)           | 0.704 (400)           | 0.832 (42)         |
| NERVOUS SYSTEM (N)                                                  | 0.697 (1050)          | 0.68 (2177)           | 0.722 (139)        |
| ANTIPARASITIC PRODUCTS, INSECTICIDES AND REPELLENTS (P)             | 0.693 (39)            | 0.716 (79)            | 0.663 (6)          |
| RESPIRATORY SYSTEM (R)                                              | 0.763 (214)           | 0.721 (320)           | 0.303 (11)         |
| SENSORY ORGANS (S)                                                  | 0.642 (43)            | 0.645 (104)           | 0.719 (12)         |
| VARIOUS (V)                                                         | 0.663 (162)           | 0.678 (207)           | 0.285 (5)          |

Table 1: ROCAUC values and the number of positive instances in the evaluation datasets when dividing our dataset in different drug categories.
